# Supplementary material for: Targeting SRC Kinase Signaling in Pancreatic Cancer Stem Cells
Source: PubMed Central journal article supplement (PMC7588004; doi:10.3390/ijms21207437), 2020-10-09

**Table S1 Detailed information for antibodies used**

| Name                                 | Type              | Supplier                       | Catalog #   | Origin                     | Dilution Ratio |
|--------------------------------------|-------------------|--------------------------------|-------------|----------------------------|----------------|
| $\beta$ -Actin                       | mouse monoclonal  | Sigma-Aldrich (Merck)          | A5441       | San Luis, MI, USA          | 1:1000         |
| p27 <sup>Kip1</sup> (Clone G173-524) | mouse monoclonal  | BD-Biosciences                 | #554069     | Franklin Lakes, NJ, USA    | 1:1000         |
| Cyclin D1 (H-295)                    | rabbit polyclonal | Santa Cruz Biotechnology, Inc. | sc-753      | Dallas, TX, USA            | 1:500          |
| Src-kinases (Src2)                   | rabbit polyclonal | Santa Cruz Biotechnology, Inc. | sc-18       | Dallas, TX, USA            | 1:1000         |
| pY418-SRC                            | rabbit polyclonal | Invitrogen                     | #44660      | Camarillo, CA, USA         | 1:1000         |
| FAK                                  | rabbit polyclonal | Santa Cruz Biotechnology, Inc. | sc-557      | Dallas, TX, USA            | 1:1000         |
| Y925-FAK                             | rabbit polyclonal | Cell Signaling Technology      | CTS#9101    | Danvers, MA, USA           | 1:1000         |
| ERK1/2                               | rabbit polyclonal | Santa Cruz Biotechnology, Inc. | sc-154      | Dallas, TX, USA            | 1:1000         |
| pT202/pY204-ERK1-2                   | rabbit polyclonal | Cell Signaling Technology      | CST #9101   | Danvers, MA, USA           | 1:1000         |
| AKT                                  | rabbit polyclonal | Santa Cruz Biotechnology, Inc. | sc-8312     | Dallas, TX, USA            | 1:1000         |
| pS473-AKT                            | rabbit polyclonal | Cell Signaling Technology      | CST #9271   | Danvers, MA, USA           | 1:1000         |
| MYC                                  | rabbit polyclonal | Santa Cruz Biotechnology, Inc. | sc-764      | Dallas, TX, USA            | 1:1000         |
| CD133-APC                            | mouse monoclonal  | Miltenyi                       | 130-111-080 | Bergisch Gladbach, Germany | 1:20           |
| CXCR4-PE                             | mouse monoclonal  | Miltenyi                       | 130-117-354 | Bergisch Gladbach, Germany | 1:20           |

**Figure S1 – SRC overexpression correlates with CSC-related pathways**

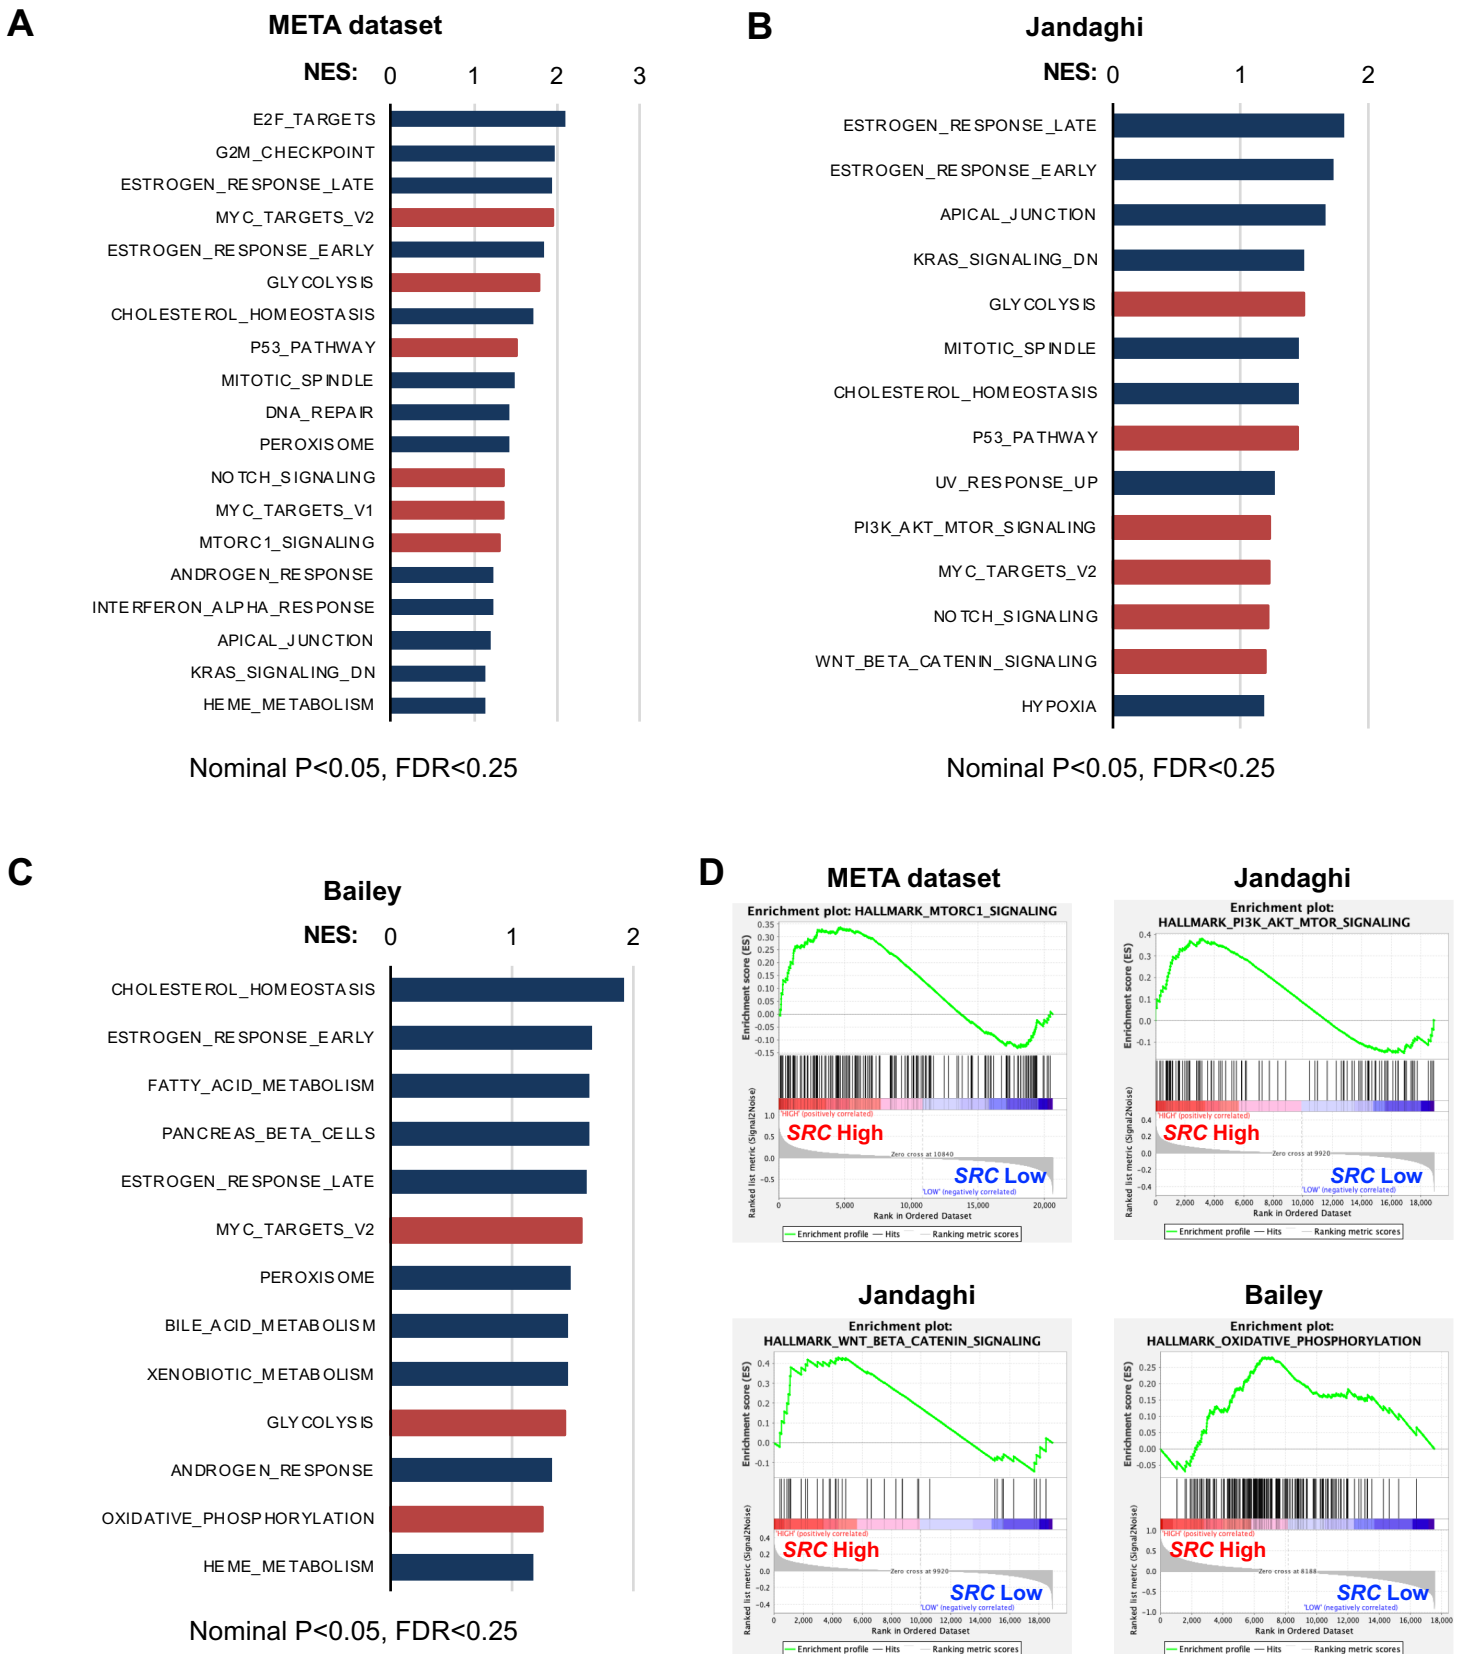

**Figure S1. SRC overexpression correlates with CSC-related pathways.** (A-C) Pathways enriched in the transcriptional profiles of tumors belonging to the top SRC high expression group, compared with the bottom expression group in the META (A), Jandaghi (B) or Bailey (C) datasets. A nominal p value of <0.05, FDR<25% is considered statistically significant. Shown are the NES values for each pathway using the Hallmark genesets. Stem-related pathways are shown in red. (D) Example enrichment plots for MTORC1, PI3K/AKT/MTOR, WNT/ $\beta$ -catenin and Oxidative Phosphorylation signaling pathways from the indicated datasets.

**Figure S2 – SRC kinase inhibitor-associated toxicity**

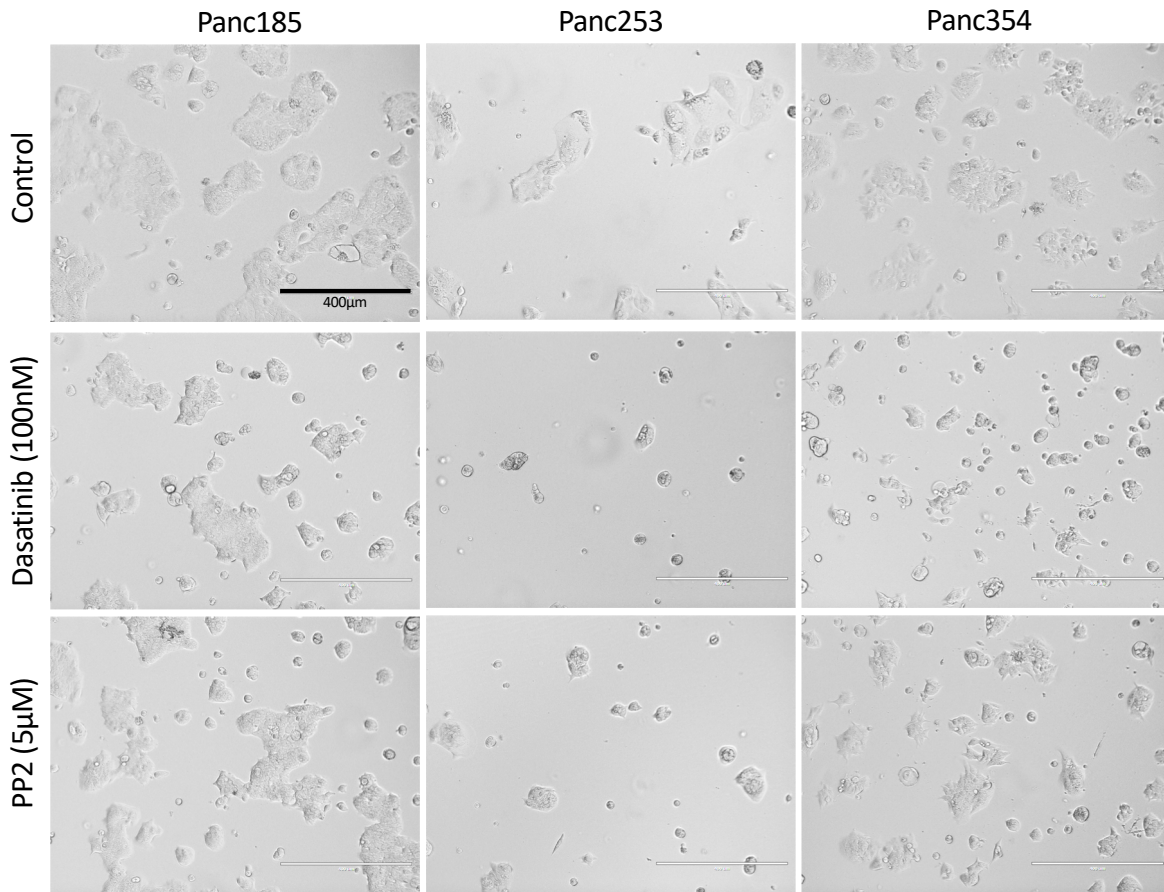

**Figure S2. SRC kinase inhibitor-associated toxicity.** Light micrographs of Panc185, Panc253 and Panc354 cell viability and growth following long term (7 day) treatment with Dasatinib or PP2 at the indicate concentrations.

**Figure S3 – The effect of SRC kinase inhibition on FAK**

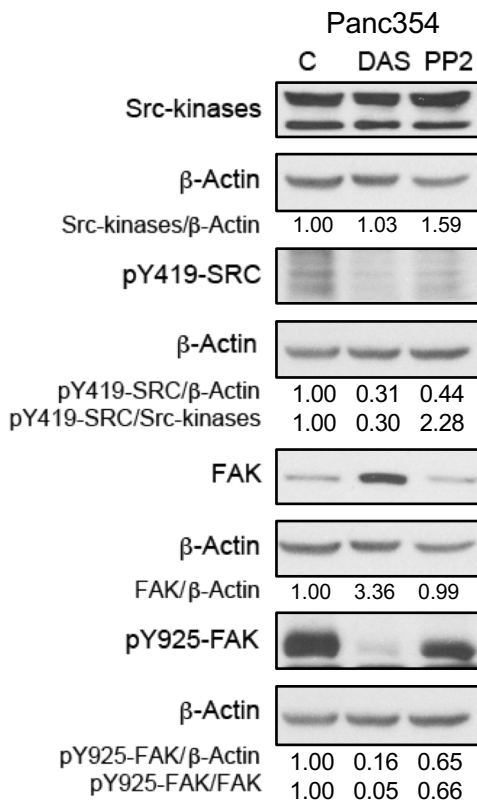

**Figure S3. The effect of SRC kinase inhibition on FAK.** WB analysis of SRC kinases and pY419-SRC protein expression (top) or FAK and pY925-FAK (bottom) in control-, PP2- or Dasatinib (DAS)-treated Panc185 or Panc253 PaCSCs. The indicated ratios for pY419-SRC/SRC-kinases and pY925-FAK/FAK were determined and shown are the fold-changes, setting control diluent(C)-treated cells as 1.0.

Figure S4 – Uncropped immunoblot images

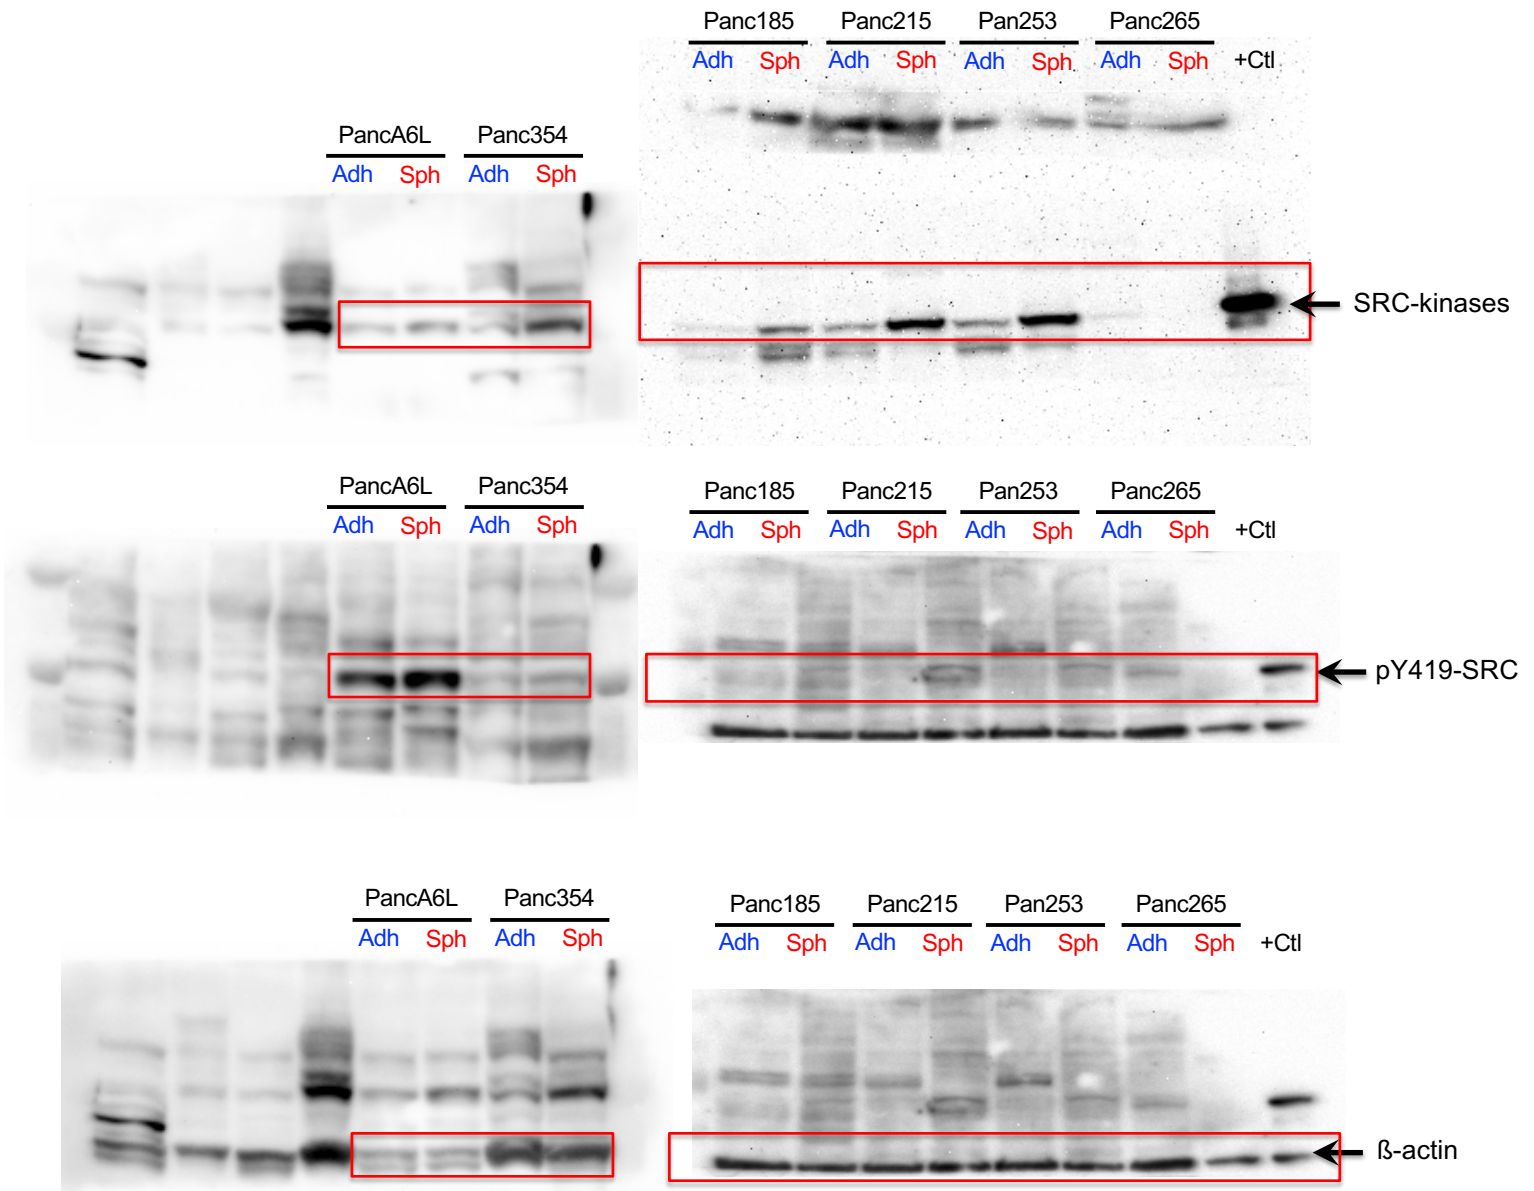

# Figure S4 – Uncropped immunoblot images - continued

Unprocessed images for Figure 5

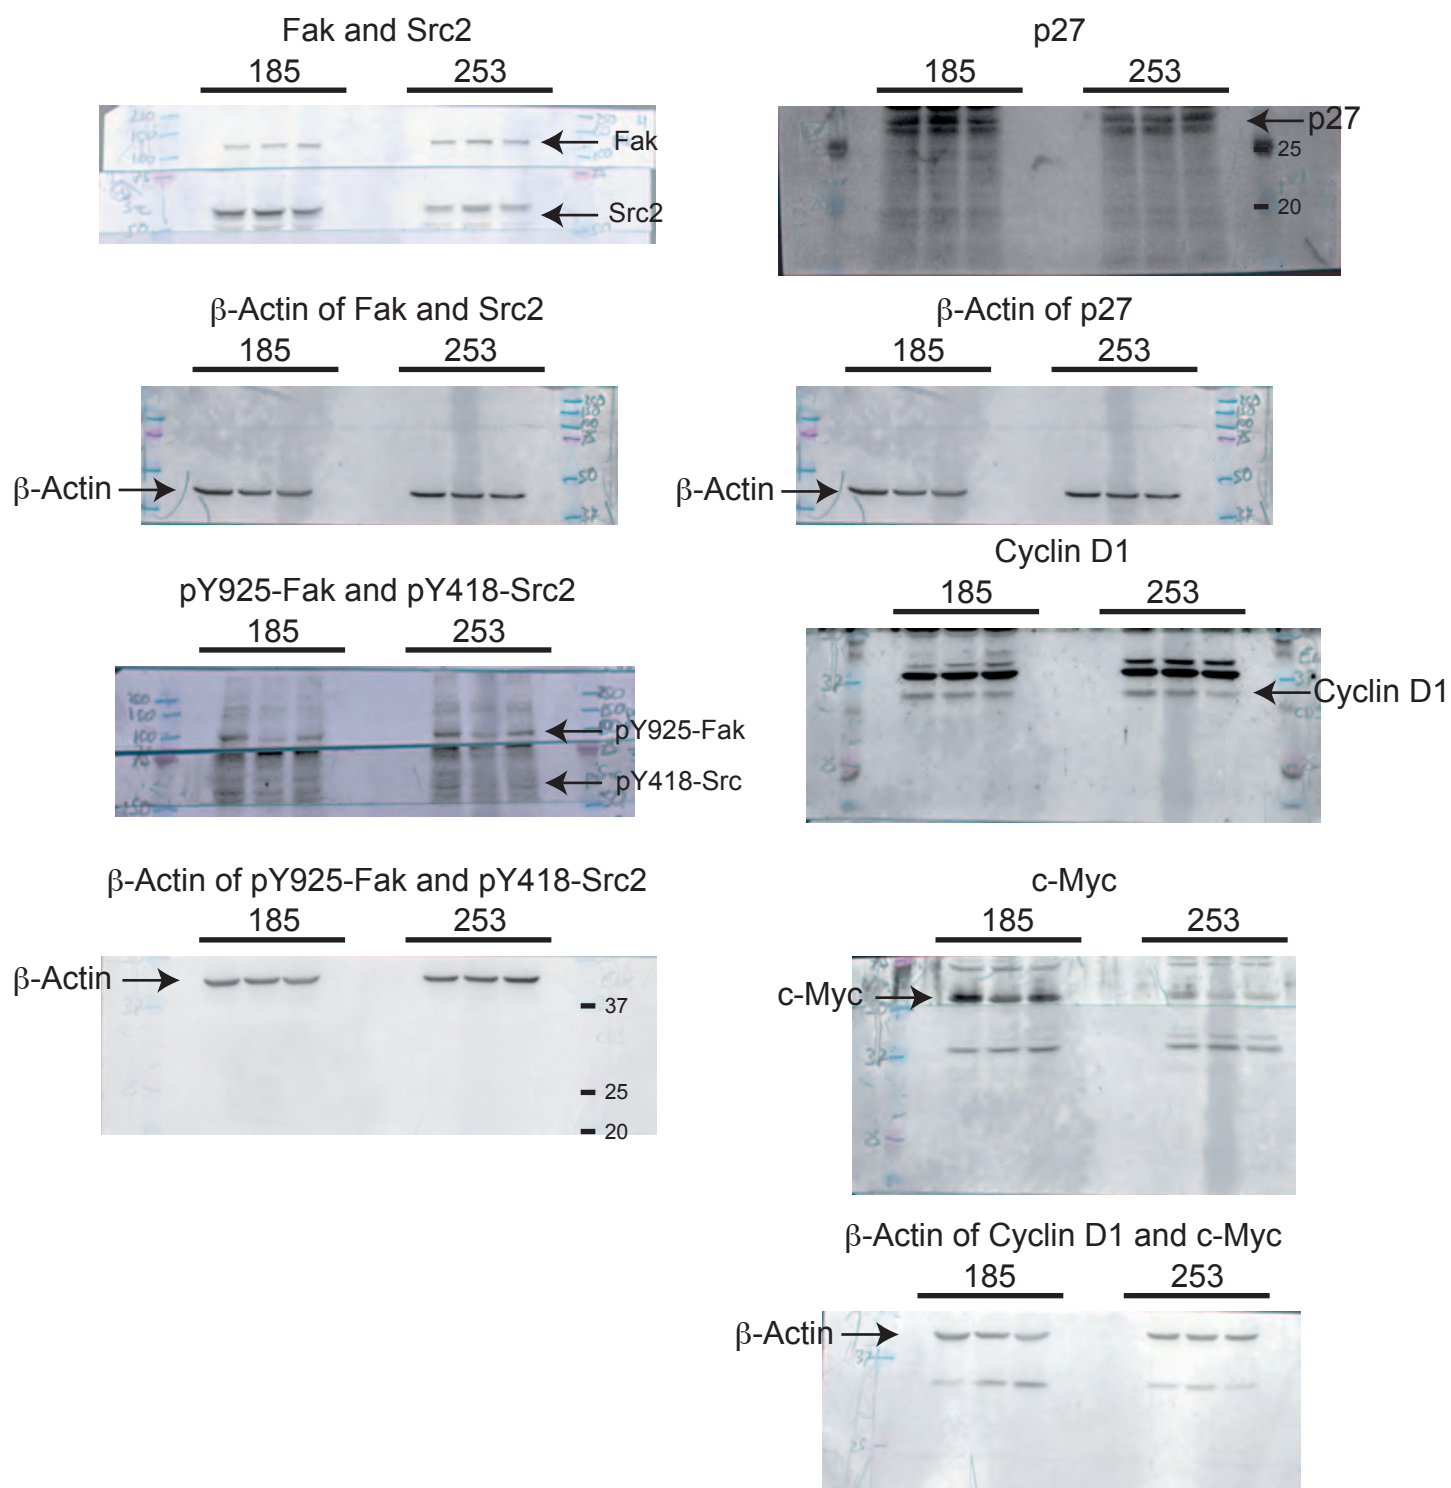

# Figure S4 – Uncropped immunoblot images - continued

Unprocessed images for Figure 5 - continued

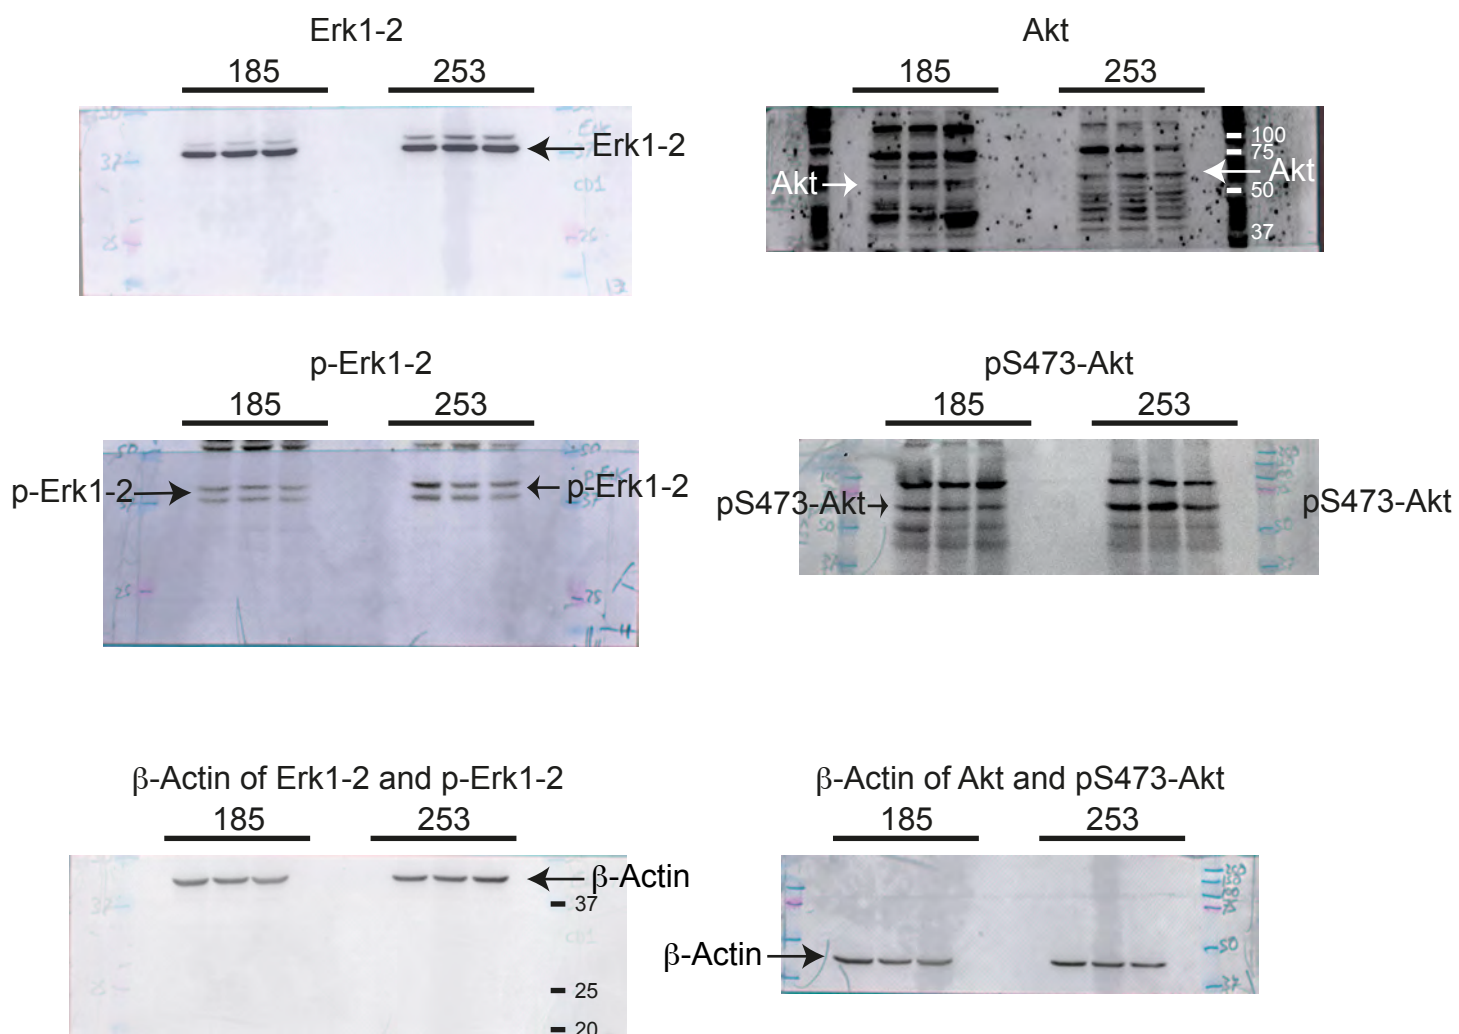

## Figure S4 – Uncropped immunoblot images - continued

Unprocessed images for Supplementary Figure S3

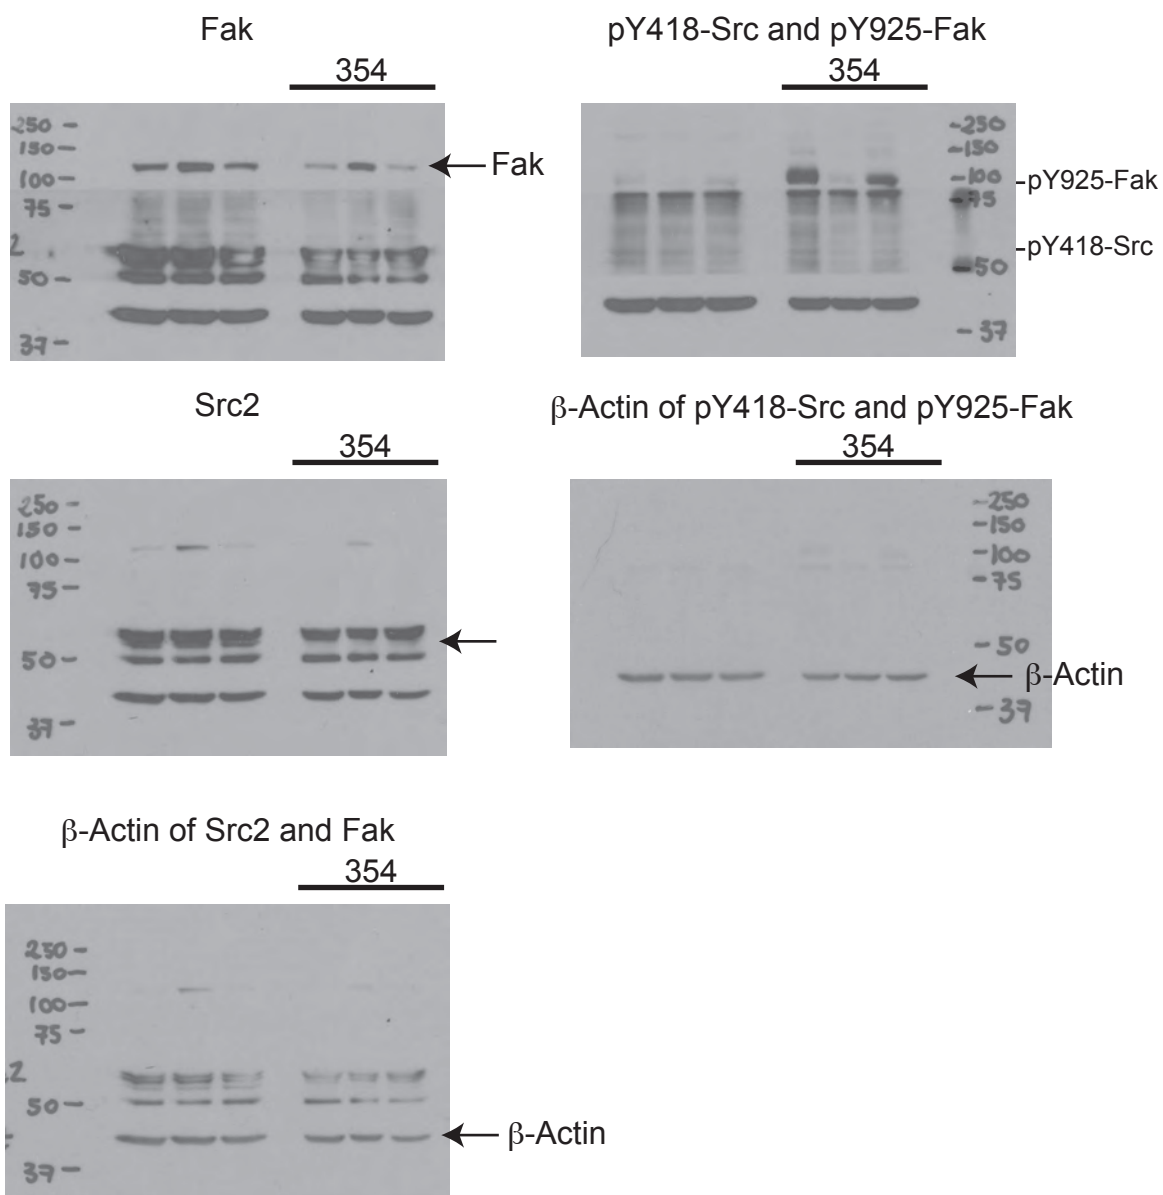

Supplement: ijms-21-07437-s001.pdf [file ijms-21-07437-s001.pdf]
